# Supplementary material for: A Rh-catalyzed isomerization of 1-alkenes to (E)-2-alkenes: from a homogeneous Rh/PPh3 catalyst to a heterogeneous Rh/POP-PPh3-SO3Na catalyst
Source: Royal Society of Chemistry journal article supplement (doi:10.1039/d2cy02016e), 2023-01-01
Supplement: d2cy02016e1.pdf [file d2cy02016e1.pdf]

## Supporting Information for

# A Rh-Catalyzed Isomerization of 1-Alkenes to (*E*)-2-Alkenes: from Homogeneous Rh/PPh<sub>3</sub> Catalyst to Heterogeneous Rh/POP-PPh<sub>3</sub>-SO<sub>3</sub>Na Catalyst

Ziqi Liu,<sup>a,†</sup> Jiaxin Song,<sup>a,†</sup> Yushuang Zhang,<sup>a</sup> Shuhui Sun,<sup>a</sup> Zhe Kun,<sup>a</sup> Jianbin Chen,<sup>b</sup> Congxia Xie<sup>a</sup> and Xiaofei Jia\*<sup>a</sup>

<sup>a</sup>Key Laboratory of Optic-electric Sensing and Analytical Chemistry for Life Science, MOE, College of Chemistry and Molecular Engineering, Qingdao University of Science and Technology, Qingdao 266042, P. R. China.

<sup>b</sup>Shandong Provincial Key Laboratory of Molecular Engineering, School of Chemistry and Chemical Engineering, Qilu University of Technology (Shandong Academy of Sciences), Jinan 250353, P. R. China.

|                                                                                                                 |    |
|-----------------------------------------------------------------------------------------------------------------|----|
| <b>1. General methods</b> .....                                                                                 | 1  |
| <b>2. Studies of the isomerization reaction conditions</b> .....                                                | 2  |
| <b>3. Synthesis of Rh/POP-PPh<sub>3</sub> and Rh/POP-PPh<sub>3</sub>-SO<sub>3</sub>Na</b> .....                 | 3  |
| <b>4. XPS spectra of Rh/POP-PPh<sub>3</sub>-SO<sub>3</sub>Na</b> .....                                          | 5  |
| <b>5. TGA curve of Rh/POP-PPh<sub>3</sub>-SO<sub>3</sub>Na</b> .....                                            | 6  |
| <b>6. General procedure for Rh-catalyzed isomerization of 1-alkenes</b> .....                                   | 6  |
| <b>7. Study scope for isomerization of 1-alkenes catalyzed by Rh/POP-PPh<sub>3</sub>-SO<sub>3</sub>Na</b> ..... | 7  |
| <b>8. Recycling tests of the Rh/POP-PPh<sub>3</sub>-SO<sub>3</sub>Na in the isomerization of 1a</b> .....       | 7  |
| <b>9. Deuterium-labelling experiments</b> .....                                                                 | 8  |
| <b>10. Characterization data for the products <i>trans</i>-2-alkenes</b> .....                                  | 10 |
| <b>11. NMR spectra of internal alkenes</b> .....                                                                | 12 |
| <b>12. GC data for entries 5, 10-12</b> .....                                                                   | 16 |
| References:.....                                                                                                | 17 |

## 1. General methods.

Unless otherwise noted, all manipulations involving air- or moisture-sensitive compounds were performed in a nitrogen-filled glovebox or using standard Schlenk techniques. Solvents were dried according to standard procedures.  $^1\text{H}$  NMR spectra were recorded on 400 MHz by using a Bruker Avance 400 spectrometer. Chemical shifts ( $\delta$  values) were reported in ppm with internal TMS ( $^1\text{H}$  NMR) as the standard. The SEM and TEM spectra were obtained on a Zeiss sigma 500 and JEOL-2100F spectrometers, respectively.  $\text{N}_2$  sorption isotherm was obtained on a Micromeritics ASAP 2460. Thermogravimetric analysis was determined on NETZSCH TG 209 F1. X-ray photoelectron spectroscopy (XPS) was performed on a ThermoScientific ESCALAB 250Xi with the Al  $\text{K}\alpha$  radiation as X-ray source ( $h\nu=1486.6$  eV). The binding energies were referenced to the C1s line at 284.8 eV from adventitious carbon.

## 2. Studies of the isomerization reaction conditions.

**Table S1.** Studies of the isomerization reaction conditions<sup>a</sup>

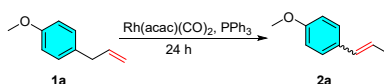

| entry | $\text{PPh}_3/\text{Rh}$ | solvent                  | T<br>(°C) | yield <sup>b</sup><br>(%) | <i>E/Z</i> <sup>b</sup> |
|-------|--------------------------|--------------------------|-----------|---------------------------|-------------------------|
| 1     | 0:1                      | EtOH                     | 100       | 46                        | 6                       |
| 2     | 1:1                      | EtOH                     | 100       | 52                        | 7                       |
| 3     | 2:1                      | EtOH                     | 100       | 79                        | 10                      |
| 4     | 3:1                      | EtOH                     | 100       | 98                        | 14                      |
| 5     | 4:1                      | EtOH                     | 100       | 97                        | 12                      |
| 6     | 5:1                      | EtOH                     | 100       | 70                        | 11                      |
| 7     | 3:1                      | EtOH                     | 90        | 37                        | 8                       |
| 8     | 3:1                      | EtOH                     | 110       | 97                        | 11                      |
| 9     | 3:1                      | Toluene                  | 100       | 63                        | 8                       |
| 10    | 3:1                      | 1,4-Dioxane              | 100       | 81                        | 11                      |
| 11    | 3:1                      | THF                      | 100       | 10                        | 8                       |
| 12    | 3:1                      | $\text{CH}_2\text{Cl}_2$ | 100       | 48                        | 9                       |
| 13    | 3:1                      | MeOH                     | 100       | 92                        | 11                      |
| 14    | 3:1                      | <i>n</i> -Propanol       | 100       | 30                        | 9                       |

|                 |     |                    |     |    |    |
|-----------------|-----|--------------------|-----|----|----|
| 15              | 3:1 | <i>i</i> -Propanol | 100 | 98 | 13 |
| 16              | 3:1 | Glycol             | 100 | 85 | 6  |
| 17              | 3:1 | Glycerol           | 100 | 48 | 9  |
| 18 <sup>c</sup> | 3:1 | EtOH               | 100 | 66 | 12 |
| 19 <sup>d</sup> | 3:1 | EtOH               | 100 | 73 | 11 |
| 20 <sup>e</sup> | 3:1 | EtOH               | 100 | 55 | 10 |

<sup>a</sup>Reaction conditions: **1a** (2.0 mmol), Rh(acac)(CO)<sub>2</sub> (0.002 mmol), reaction solvent (2 mL), H<sub>2</sub>O (10 μL), 24 h. <sup>b</sup>Yields and *E/Z* ratios were determined by GC analysis, decane as the internal standard. <sup>c</sup>Without H<sub>2</sub>O as the additive. <sup>d</sup>H<sub>2</sub>O (5 μL), <sup>e</sup>H<sub>2</sub>O (20 μL).

**Table S2.** Screening of phosphine ligands in isomerization reaction of **1a**.

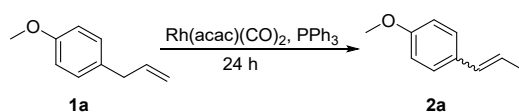

| entry | Ligand                         | solvent | temp<br>(°C) | yield<br>(%) | <i>E/Z</i> |
|-------|--------------------------------|---------|--------------|--------------|------------|
| 1     | PPh <sub>3</sub>               | EtOH    | 100          | 98           | 14         |
| 2     | DPPB                           | EtOH    | 100          | 76           | 11         |
| 3     | DPPE                           | EtOH    | 100          | 79           | 12         |
| 4     | DPPF                           | EtOH    | 100          | 62           | 10         |
| 5     | Xantphos                       | EtOH    | 100          | 80           | 9          |
| 6     | BINAP                          | EtOH    | 100          | 64           | 6          |
| 7     | Tris(4-methoxyphenyl)phosphane | EtOH    | 100          | 98           | 12         |
| 8     | Tri- <i>o</i> -tolylphosphane  | EtOH    | 100          | 87           | 11         |

Reaction conditions: **1a** (2.0 mmol), Rh(acac)(CO)<sub>2</sub> (0.002 mmol), Rh:Ligand = 1:3, EtOH (2 mL), H<sub>2</sub>O (10 μL), 100 °C, 24 h. Yields and *E/Z* ratios were determined by GC analysis, decane as the internal standard.

### 3. Synthesis of Rh/POP-PPh<sub>3</sub> and Rh/POP-PPh<sub>3</sub>-SO<sub>3</sub>Na.

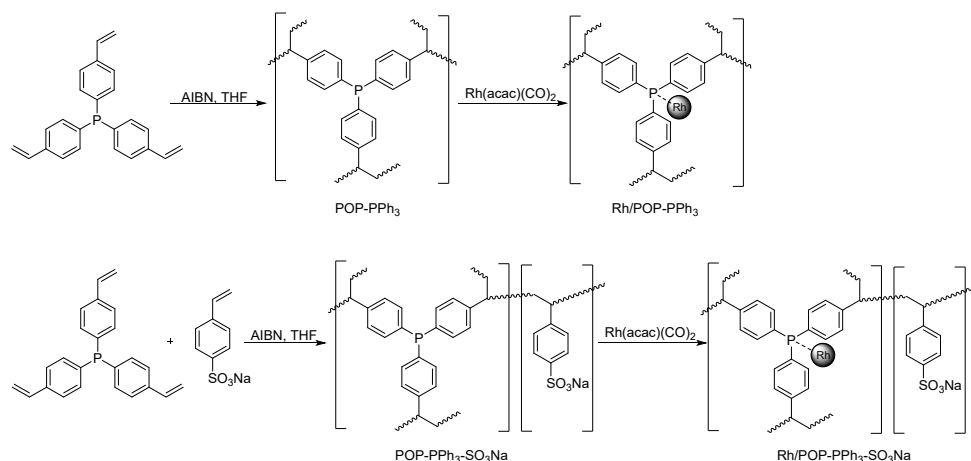

### Synthesis of Rh/POP-PPh<sub>3</sub>.

Tris(4-vinylphenyl)phosphine was prepared by following the reported literature procedure<sup>[1]</sup>. Under nitrogen, the obtained tris(4-vinylphenyl) phosphine (1.0 g, 2.95 mmol), AIBN (24.0 mg, 0.15 mmol) and THF (20 mL) were added into Schlenk flask. After stirring for 30 minutes at room temperature, the mixture was heated to 100 °C for 24 h. The white solid was formed. After evaporation of THF at 40 °C under vacuum, the crude product was washed by THF (3 × 8 mL) and separated by centrifugation. The white solid POP-PPh<sub>3</sub> (956 mg) was obtained.

A mixture of POP-PPh<sub>3</sub> (200.0 mg) in toluene (10 mL) was added in Rh(acac)(CO)<sub>2</sub> (12.0 mg) in Schlenk flask. After stirring for 24 h under N<sub>2</sub> at room temperature, the crude product was separated by using centrifuge and further washed by toluene. After removing the residual solvent under reduced pressure, the Rh/POP-PPh<sub>3</sub> (194.0 mg) was obtained.

### Synthesis of Rh/POP-PPh<sub>3</sub>-SO<sub>3</sub>Na.

In glove box, tris(4-vinylphenyl)phosphine (100.0 mg), sodium-4-vinylbenzenesulfonate (20.2 mg), AIBN(4.0 mg) and THF (2 mL) were added into a Schlenk flask. The mixture was heated to 100 °C for 24 h. The resulting product was separated by centrifugation. The crude product was washed by Toluene (4 × 2 mL) and dried under vacuum. The catalyst POP-PPh<sub>3</sub>-SO<sub>3</sub>Na (106.5 mg) was obtained.

A mixture of POP-PPh<sub>3</sub>-SO<sub>3</sub>Na (100.0 mg) in toluene (5 mL) was added into Rh(acac)(CO)<sub>2</sub> (3.65 mg) in Schlenk flask. After stirring for 24 h under N<sub>2</sub> at room temperature, the crude product was separated by using centrifuge and further washed

by toluene. After removing the residual solvent under reduced pressure, the Rh/POP-PPh<sub>3</sub>-SO<sub>3</sub>Na (98.2 mg) was obtained.

#### 4. XPS spectra of Rh/POP-PPh<sub>3</sub>-SO<sub>3</sub>Na

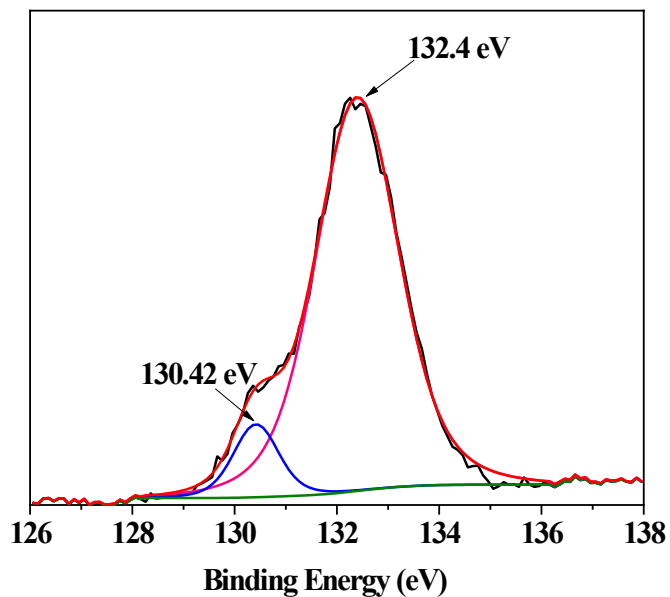

Figure S1. P 2p XPS spectra of POP-PPh<sub>3</sub>-SO<sub>3</sub>Na

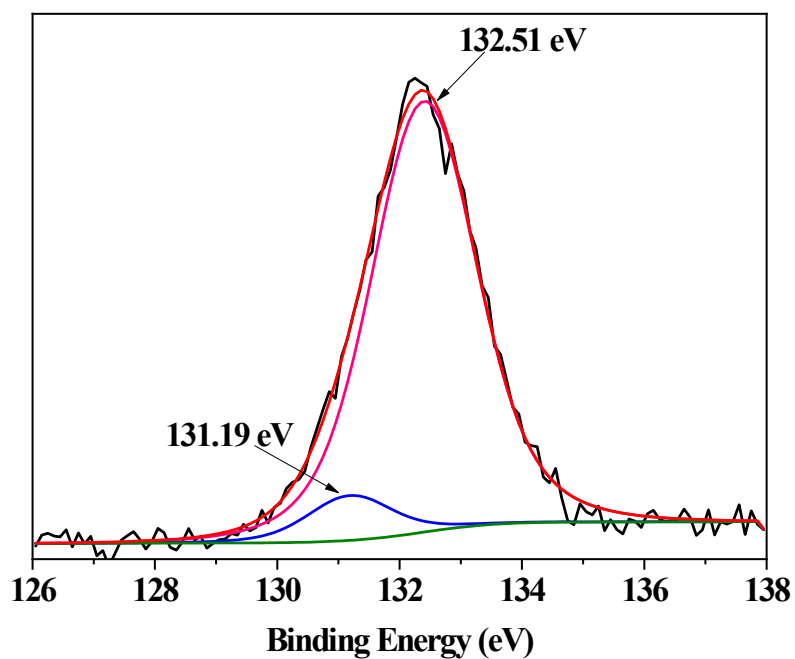

Figure S2. P 2p XPS spectra of recovered Rh/POP-PPh<sub>3</sub>-SO<sub>3</sub>Na

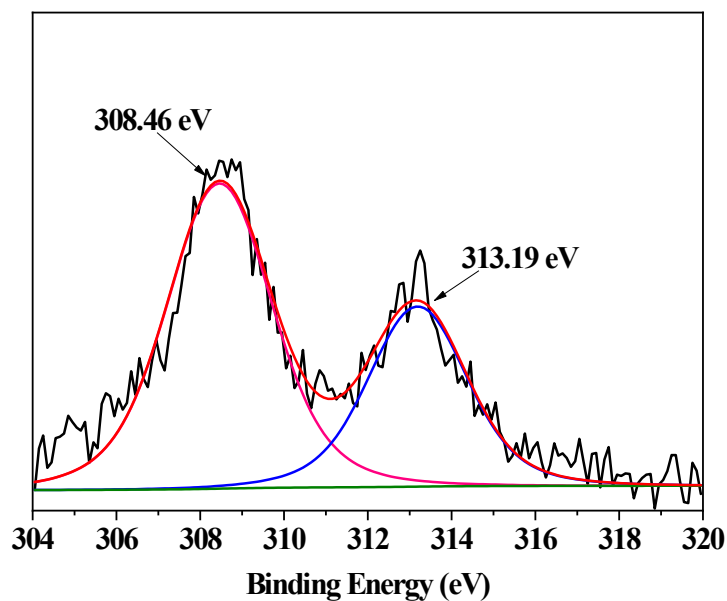

Figure S3. Rh 3d XPS spectra of recovered Rh/POP-PPh<sub>3</sub>-SO<sub>3</sub>Na

## 5. TGA curve of Rh/POP-PPh<sub>3</sub>-SO<sub>3</sub>Na.

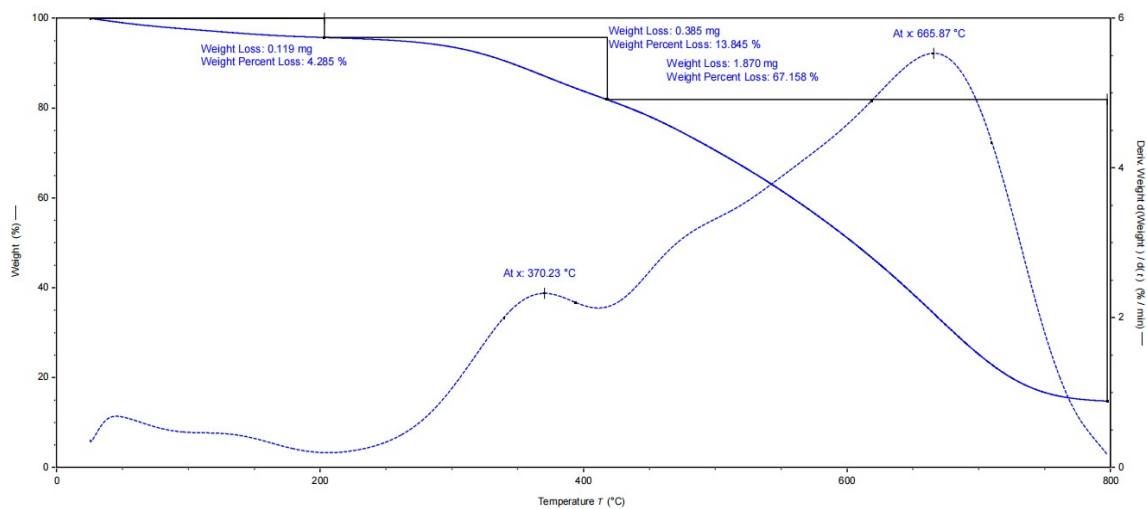

Figure S4. TGA curve of Rh/POP-PPh<sub>3</sub>-SO<sub>3</sub>Na

## 6. General procedure for Rh-catalyzed isomerization of 1-alkenes.

1. General procedure for homogeneous Rh/PPh<sub>3</sub>-catalyzed isomerization of 1-alkenes.

In a glove box, an Schlenk flask with a magnetic stirring bar was charged with 1-alkenes **1** (2 mmol), Rh(acac)(CO)<sub>2</sub> (0.5 mg, 0.002 mmol), PPh<sub>3</sub> (1.5 mg, 0.006 mmol), EtOH(2 mL), H<sub>2</sub>O (10 μL). The mixture was then heated to 100 °C (oil bath)

for 24 h.

## 2. General procedure for heterogeneous Rh-catalyzed isomerization of 1-alkenes.

In a glove box, an Schlenk flask with a magnetic stirring bar was charged with **1** (1.26 mmol), Rh/POP-PPh<sub>3</sub>-SO<sub>3</sub>Na (8.9 mg), EtOH (2 mL), H<sub>2</sub>O (10 μL). The mixture was then heated to 120 °C (oil bath) for 24 h.

## 7. Study scope for isomerization of 1-alkenes catalyzed by Rh/POP-PPh<sub>3</sub>-SO<sub>3</sub>Na.

Table S3. Study scope for isomerization of 1-alkenes catalyzed by Rh/POP-PPh<sub>3</sub>-SO<sub>3</sub>Na<sup>a</sup>

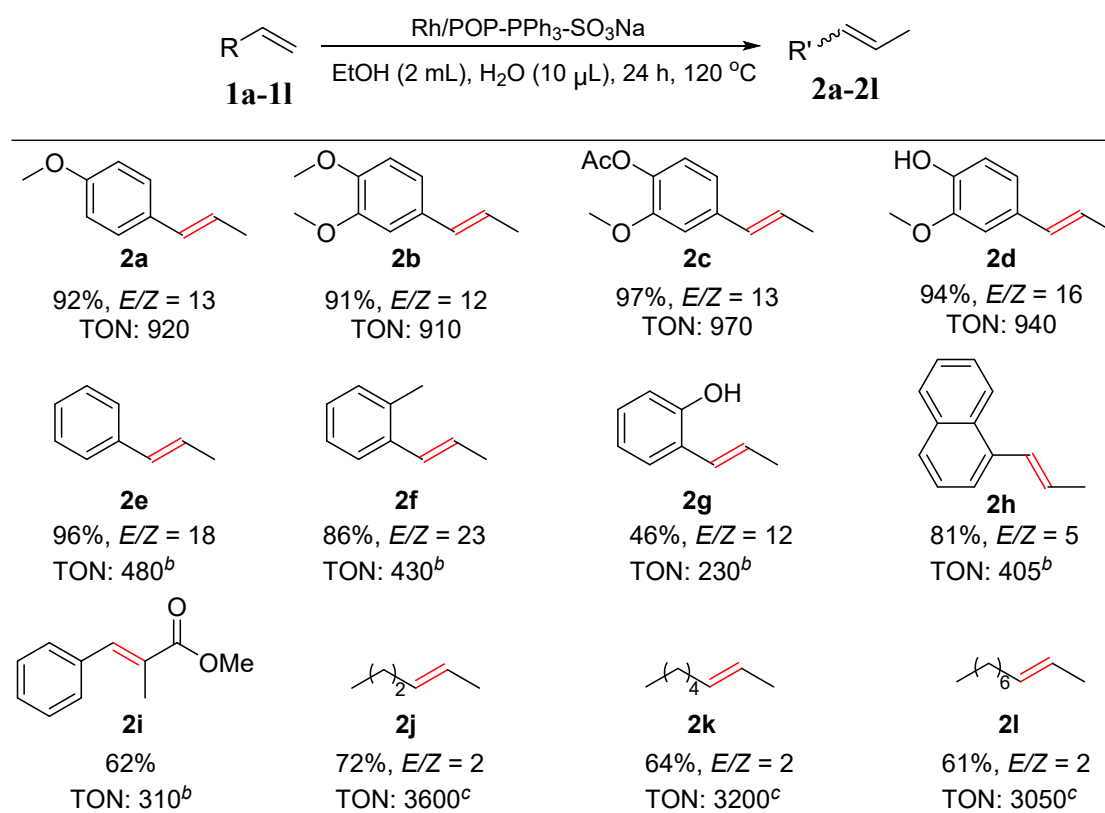

<sup>a</sup>1-alkenes (1.26 mmol), Rh/POP-PPh<sub>3</sub>-SO<sub>3</sub>Na (8.9 mg), S/C = 1000. Yields and *E/Z* ratios were determined by GC analysis or <sup>1</sup>H NMR. <sup>b</sup>1-alkenes (0.63 mmol), Rh/POP-PPh<sub>3</sub>-SO<sub>3</sub>Na (8.9 mg), S/C = 500. <sup>c</sup>1-alkenes (6.3 mmol), Rh/POP-PPh<sub>3</sub>-SO<sub>3</sub>Na (8.9 mg), S/C = 5000.

## 8. Recycling tests of the Rh/POP-PPh<sub>3</sub>-SO<sub>3</sub>Na in the isomerization of **1a**

A Schlenk flask with a magnetic stirring bar was successively charged with **1a** (1.26 mmol), Rh/POP-PPh<sub>3</sub>-SO<sub>3</sub>Na (8.9 mg), EtOH (2 mL) and H<sub>2</sub>O (10 μL). The Schlenk flask was purged with N<sub>2</sub> for three times. The mixture was stirred under a

nitrogen (balloon) atmosphere at 120 °C for 10 h. After the reaction, the mixture was diluted with EtOH (3×2 mL). The catalyst of Rh/POP-PPh<sub>3</sub>-SO<sub>3</sub>Na was recovered by centrifugation. Then the recovered catalyst used to test next recycling reaction with the same condition and procedure. Yields of **2a** were determined on the basis of GC analysis. GC analysis condition: SE-54, 30 m×0.32 mm×0.33 mm, flow rate 2.0 mL min<sup>-1</sup>, method: 50 °C was maintained for 5 min, and then ramped from 50 °C to 250 °C at a rate of 20 °C min<sup>-1</sup>, 250 °C was maintained for 5 min.

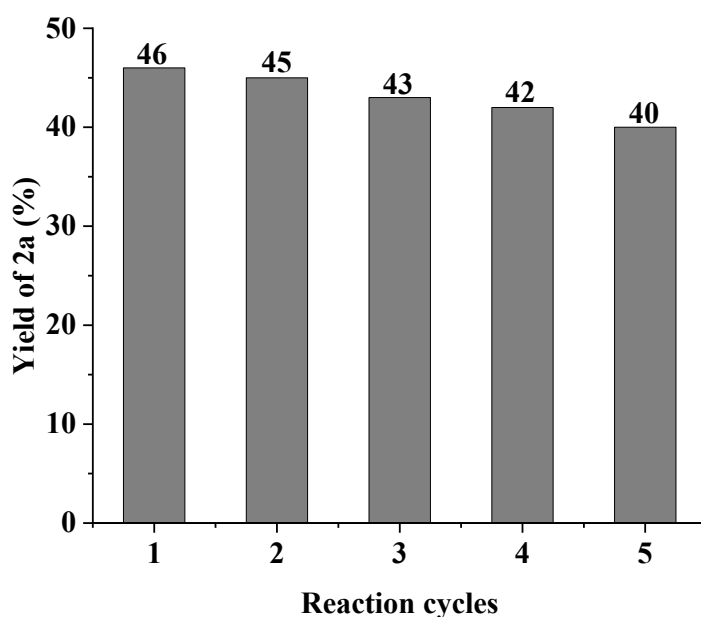

Figure S5. Reusability studies of the Rh/POP-PPh<sub>3</sub>-SO<sub>3</sub>Na in the isomerization of **1a**

## 9. Deuterium-labelling experiments

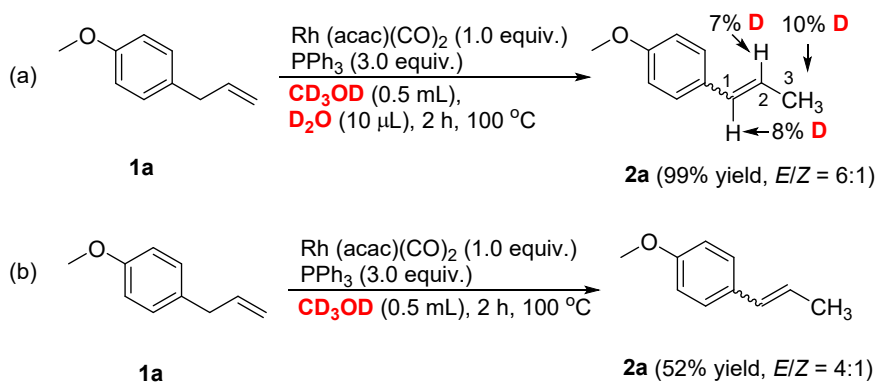

(a): In glove box, **1a** (3 μL, 1 eq), Rh(acac)(CO)<sub>2</sub> (5.0 mg, 1 eq), PPh<sub>3</sub> (15.0 mg, 3 eq), CD<sub>3</sub>OD (0.5 mL), D<sub>2</sub>O (10 μL) were added into a Schlenk flask. The mixture



was heated to 100 °C for 2 h, then the mixture was directly characterized by  $^1\text{H}$  NMR.

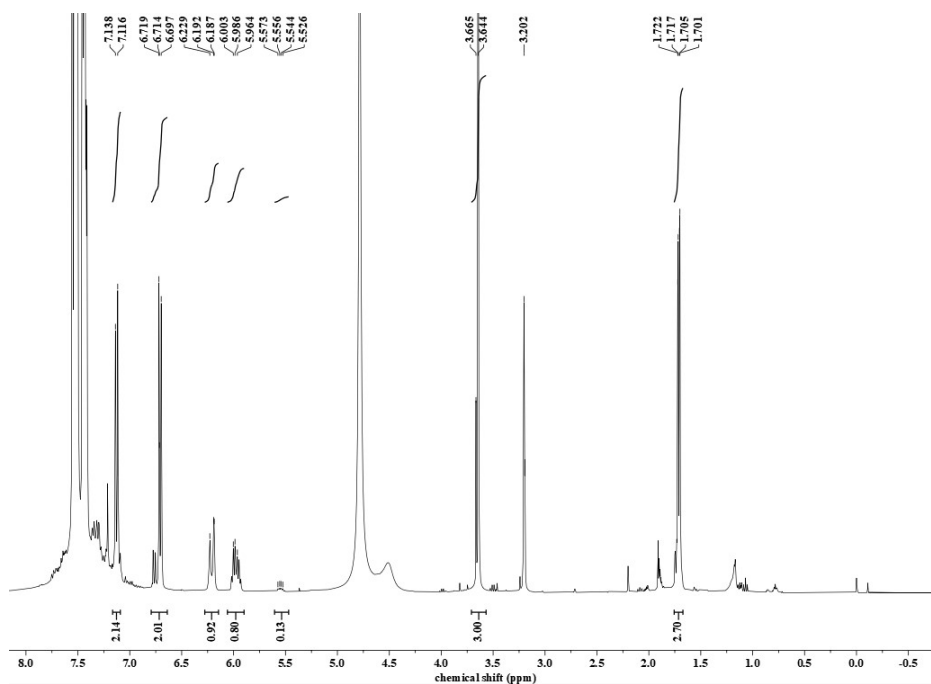

(b): In glove box, 1a (3  $\mu\text{L}$ , 1 eq),  $\text{Rh}(\text{acac})(\text{CO})_2$  (5.0 mg, 1 eq)  $\text{PPh}_3$  (15.0 mg, 3 eq),  $\text{CD}_3\text{OD}$  (0.5 mL) were added into a Schlenk flask. The mixture was heated to 100 °C for 2 h, then the mixture was directly characterized by  $^1\text{H}$  NMR.

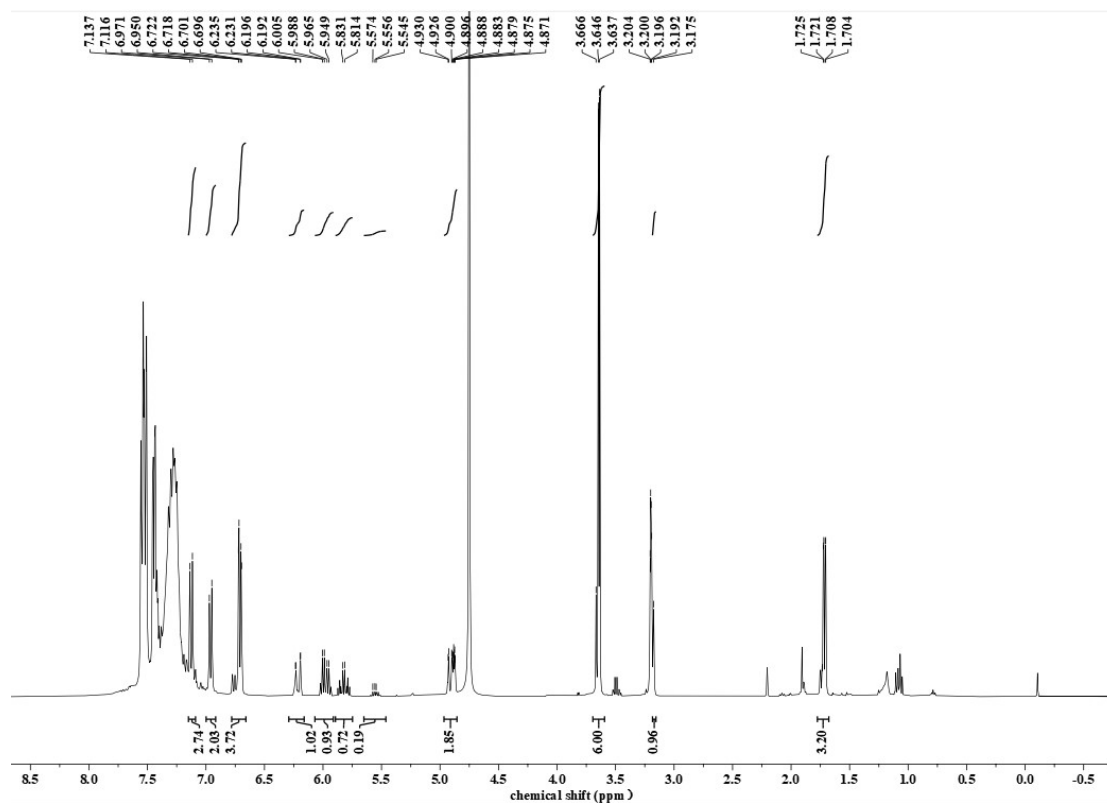

## 10. Characterization data for the products *trans*-2-alkenes.

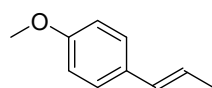

**1-(4-Methoxyphenyl)propene (2a)**<sup>[2]</sup>: colorless oil, 293.0 mg, 99% yield. <sup>1</sup>H NMR (400 MHz, CDCl<sub>3</sub>): δ 7.22 (d, *J* = 7.2 Hz, 2H), 6.80 (d, *J* = 7.2 Hz, 2H), 6.32 (d, *J* = 12.8 Hz, 1H), 6.09-6.02 (m, 1H), 3.76 (s, 3H), 1.82 (dd, *J* = 5.2, 1.6 Hz, 3H) ppm.

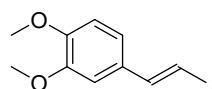

**(E)-1,2-dimethoxy-4-(prop-1-en-1-yl)benzene (2b)**<sup>[2]</sup>: colorless oil, 331.5 mg, 93% yield. <sup>1</sup>H NMR (400 MHz, CDCl<sub>3</sub>): δ 6.89-6.78 (m, 3H), 6.34 (dd, *J* = 15.6, 2.0 Hz, 1H), 6.13-6.07 (m, 1H), 3.88 (s, 3H), 3.86 (s, 3H), 1.86 (dd, *J* = 6.4, 1.6 Hz, 3H) ppm.

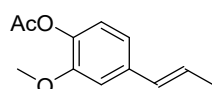

**(E)-2-methoxy-4-(prop-1-en-1-yl)phenyl acetate (2c)**<sup>[2]</sup>: colorless oil, 408.4 mg, 99% yield. <sup>1</sup>H NMR (400 MHz, CDCl<sub>3</sub>): δ 6.97-6.89 (m, 3H), 6.38 (d, *J* = 15.6 Hz, 1H), 6.22-6.17 (m, 1H), 3.83 (s, 3H), 2.31 (s, 3H), 1.88 (d, *J* = 6.0 Hz, 3H) ppm.

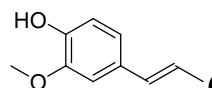

**(E)-2-methoxy-4-(prop-1-en-1-yl)phenol (2d)**<sup>[2]</sup>: light yellow oil, 305.4 mg, 93% yield. <sup>1</sup>H NMR (400 MHz, CDCl<sub>3</sub>): δ 6.89-6.85 (m, 3H), 6.35 (d, *J* = 12.8 Hz, 1H), 6.13-6.08 (m, 1H), 5.73-5.71 (m, 1H), 3.89 (s, 3H), 1.89 (d, *J* = 5.2 Hz, 3H).

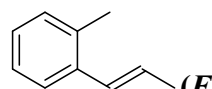

**(E)-1-methyl-2-(prop-1-en-1-yl)benzene (2f)**<sup>[3]</sup>: colorless oil, 238.0 mg, 90% yield. <sup>1</sup>H NMR (400 MHz, CDCl<sub>3</sub>): δ 7.38 (d, *J* = 15.6 Hz, 1H), 7.14-7.09 (m, 3H), 6.58 (dd, *J* = 15.6, 2.0 Hz, 1H), 6.14-6.05 (m, 1H), 2.32 (s, 3H), 1.89 (dd, *J* = 6.4, 1.6 Hz, 3H) ppm.

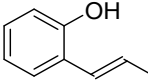 **(E)-2-(prop-1-en-1-yl)phenol (2g)** <sup>[4]</sup>: light yellow oil, 139.5 mg, 52% yield. <sup>1</sup>H NMR (400 MHz, CDCl<sub>3</sub>): δ 7.30-6.56 (m, 4H), 6.58 (dd, *J* = 16.0, 2.0 Hz, 1H), 6.21-6.15 (m, 1H), 1.87 (dd, *J* = 6.8, 2.0 Hz, 3H) ppm.

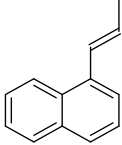 **(E)-1-(prop-1-en-1-yl)naphthalene (2h)** <sup>[5],[6]</sup>: colorless oil, 299.4 mg, 89% yield. <sup>1</sup>H NMR (400 MHz, CDCl<sub>3</sub>): δ 8.15 (d, *J* = 7.6 Hz, 1H), 7.88-7.85 (m, 1H), 7.76 (d, *J* = 8.4 Hz, 1H), 7.57-7.43 (m, 4H), 7.16 (dd, *J* = 15.6, 2.0 Hz, 1H), 6.32-6.23 (m, 1H), 2.03 (dd, *J* = 6.8, 2.0 Hz, 3H) ppm.

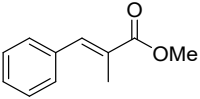 **methyl (E)-2-methyl-3-phenylacrylate (2i)** <sup>[7]</sup>: colorless oil, 246.7 mg, 70% yield. <sup>1</sup>H NMR (400 MHz, CDCl<sub>3</sub>): δ 7.62 (s, 1H), 7.32-7.11 (m, 5H), 3.74 (s, 3H), 2.05 (s, 3H) ppm.

## 11. NMR spectra of internal alkenes.

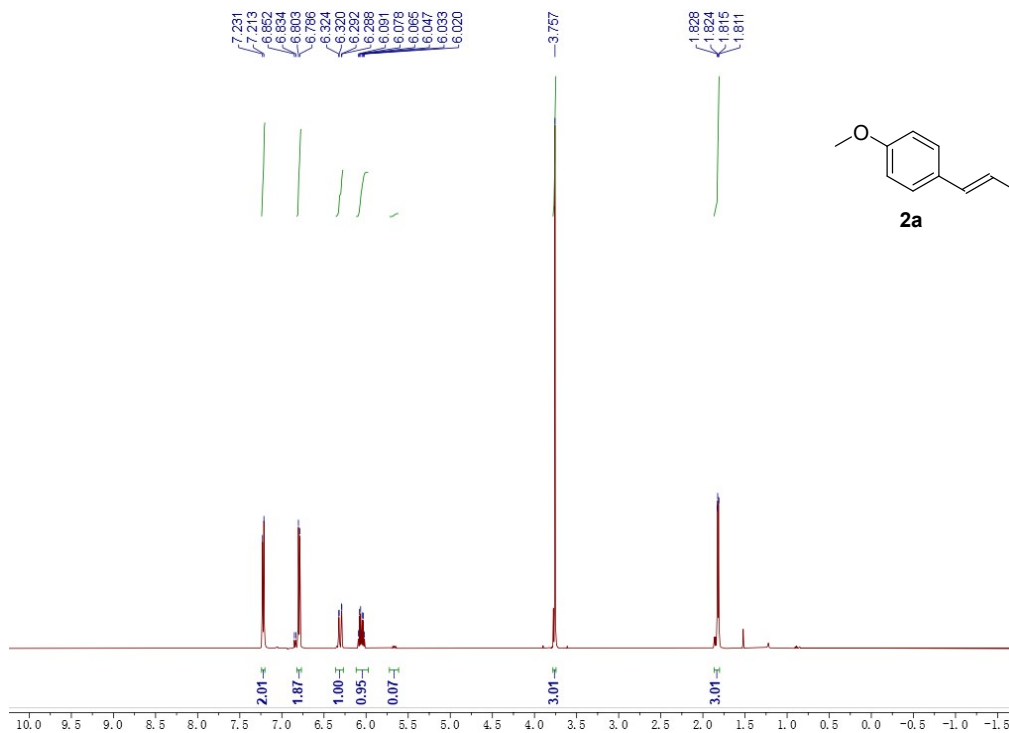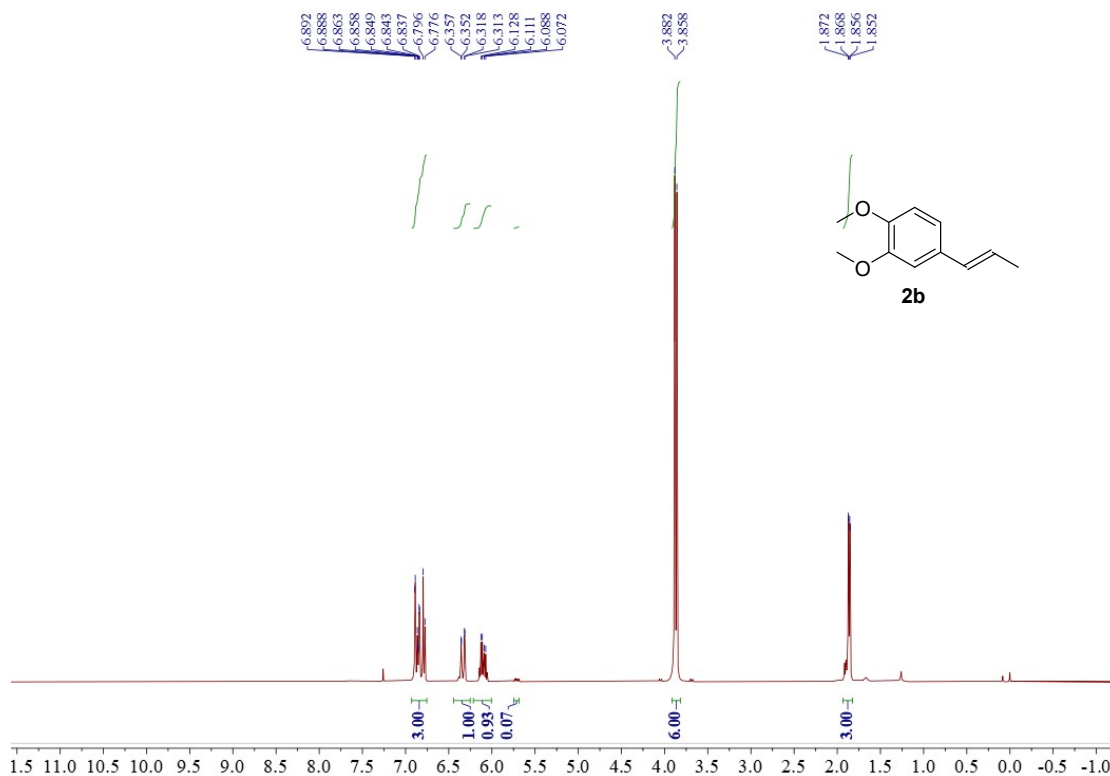

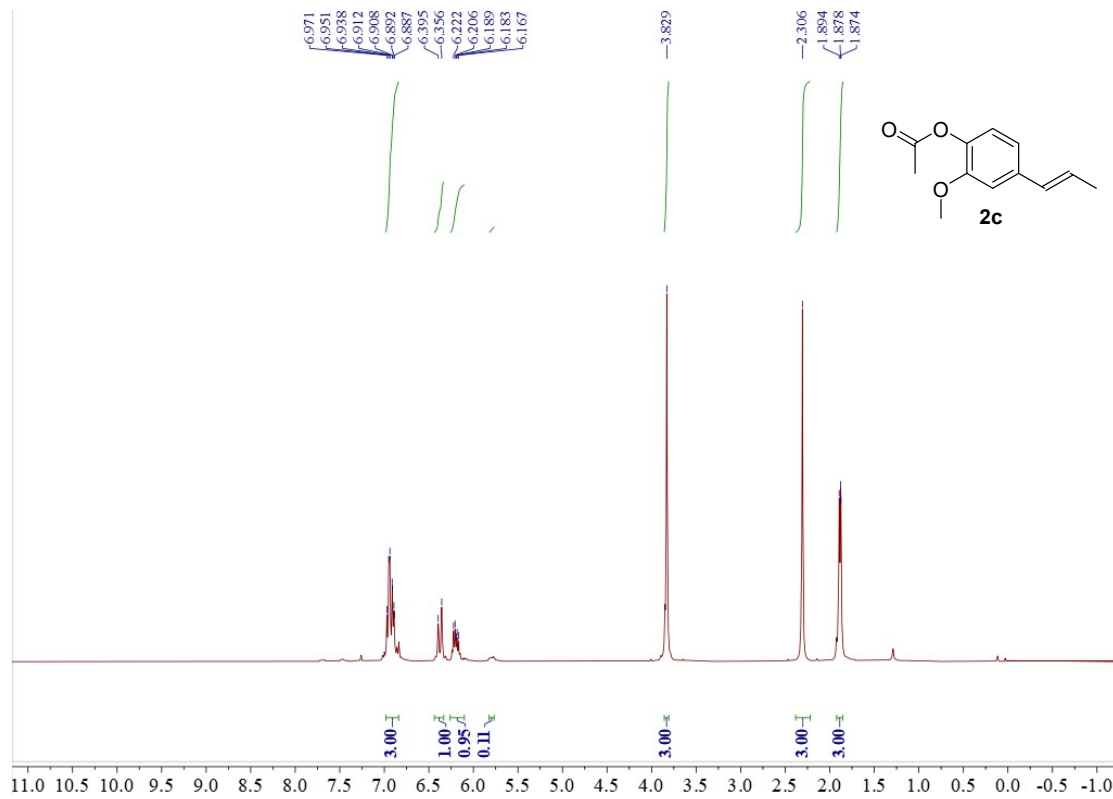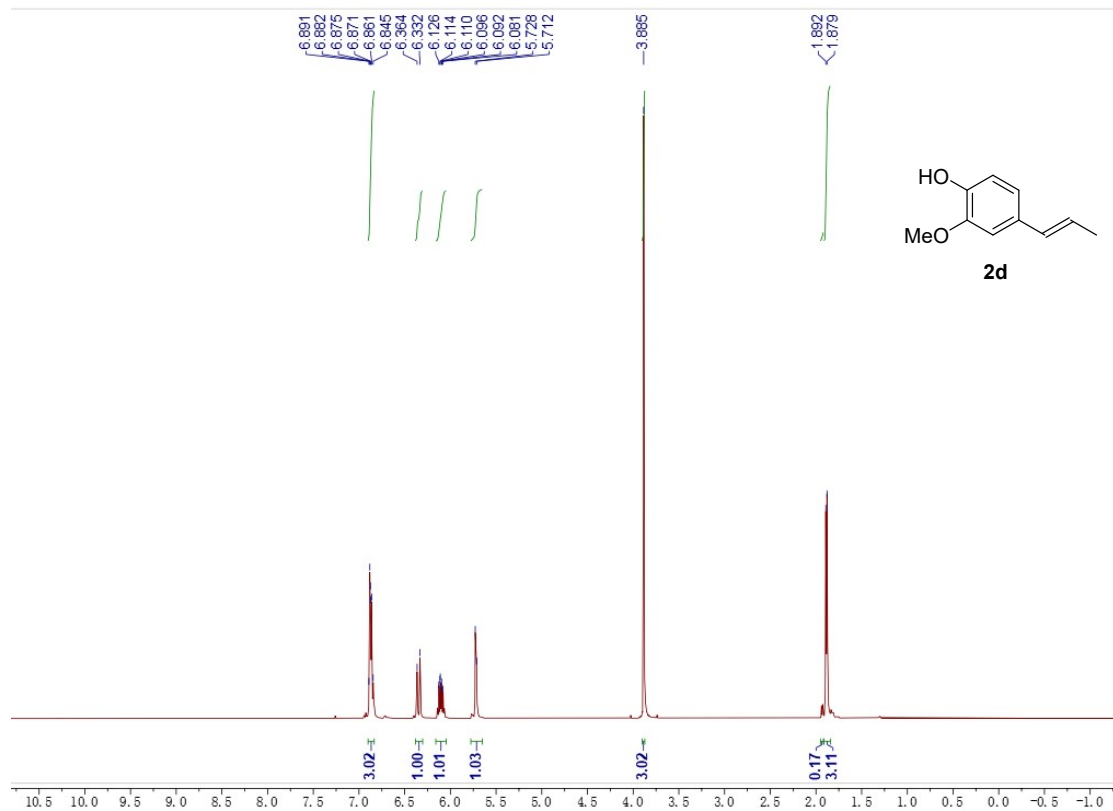

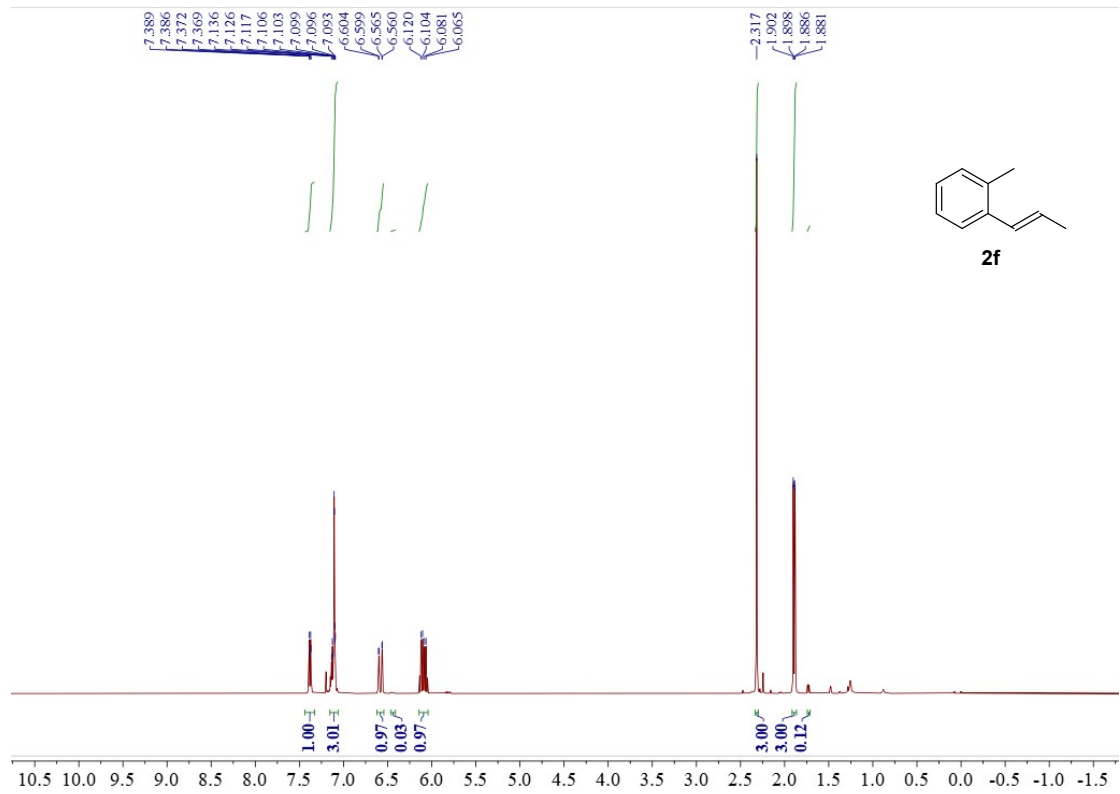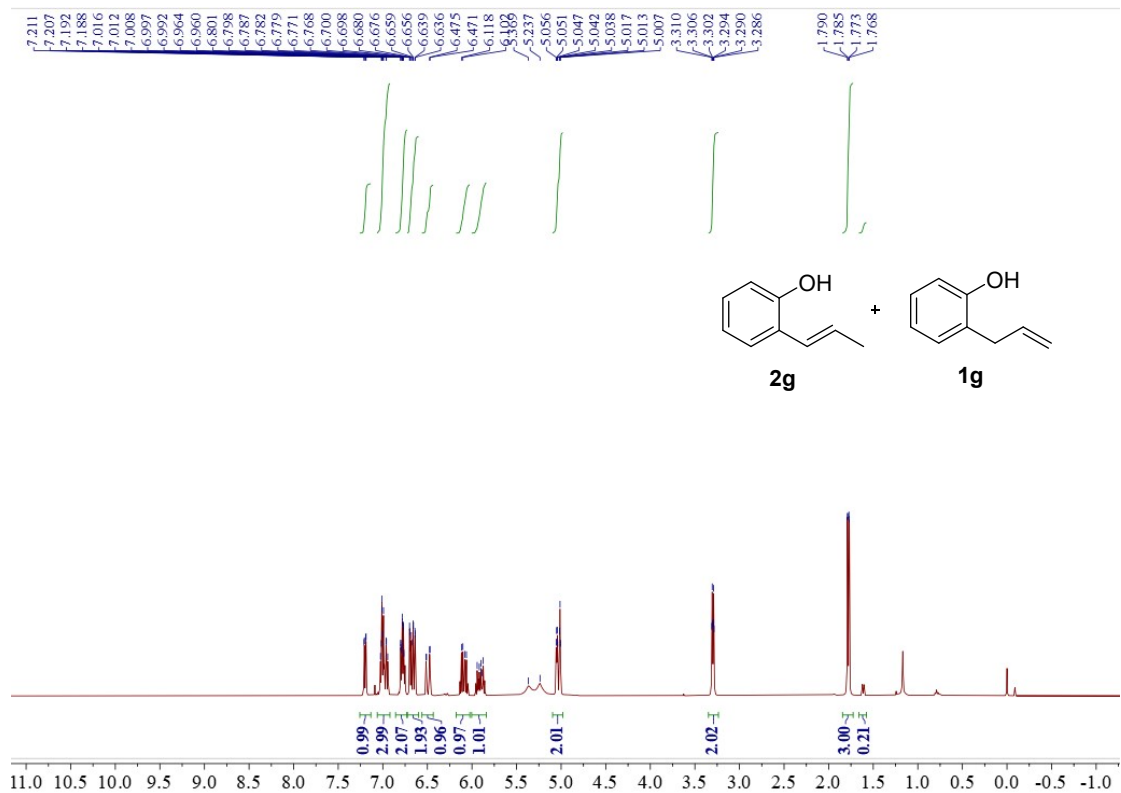

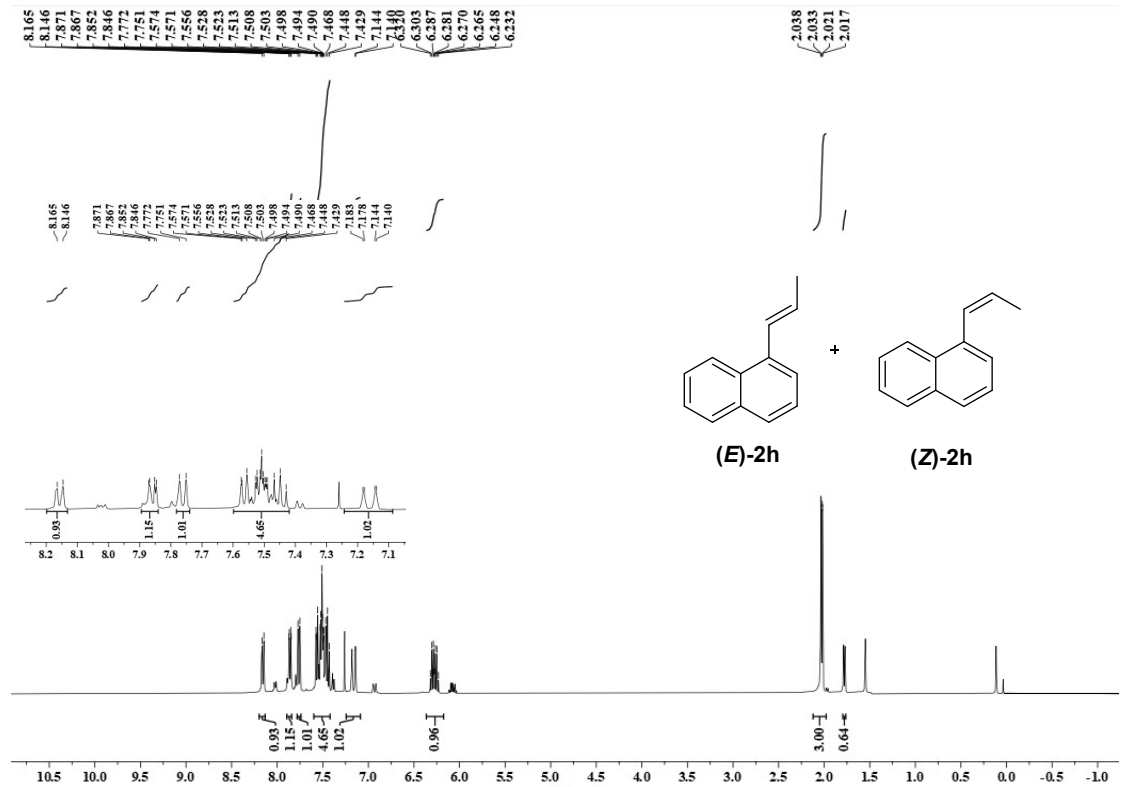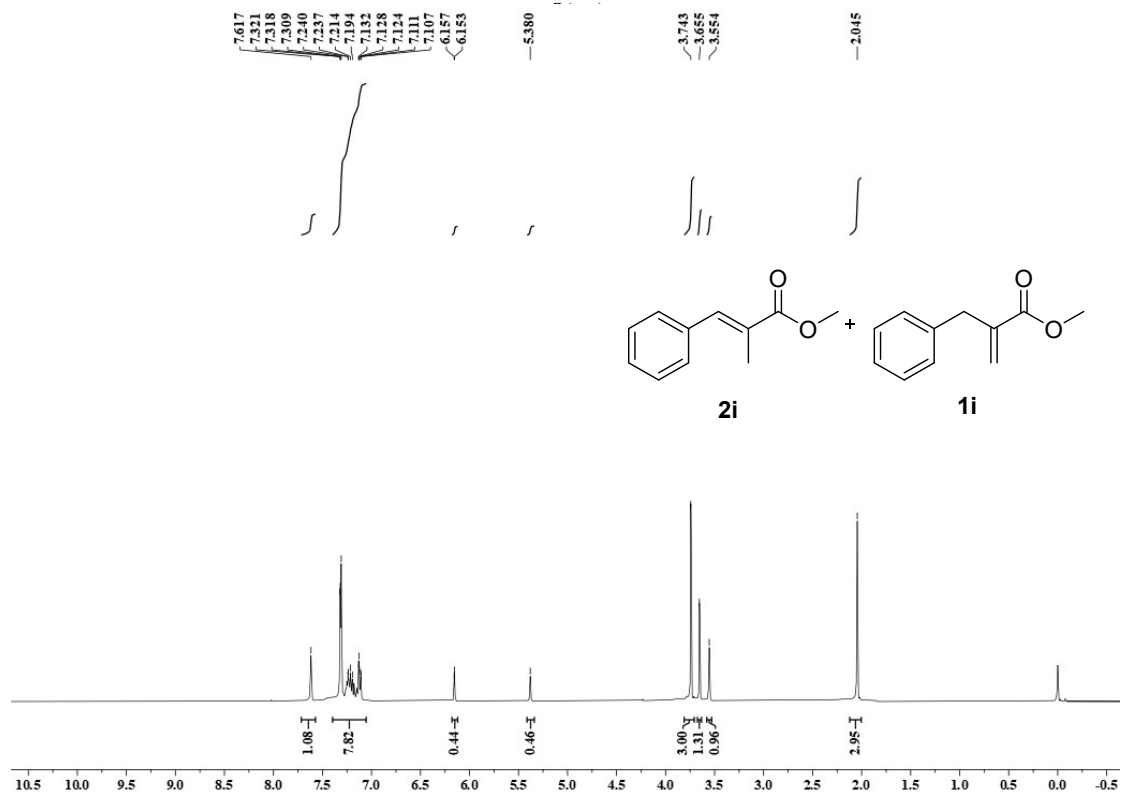

## 12. GC data for entries 5, 10-12.

entry 5:

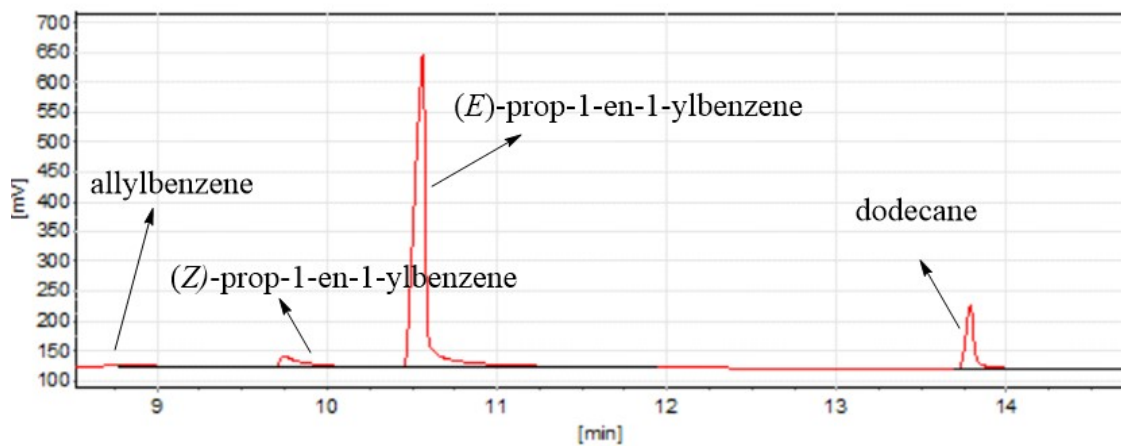

entry 10:

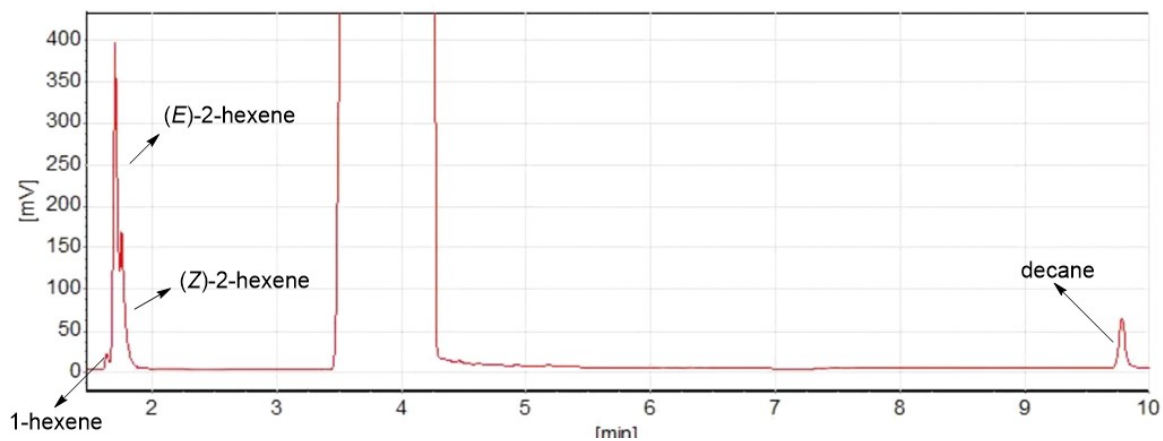

entry 11:

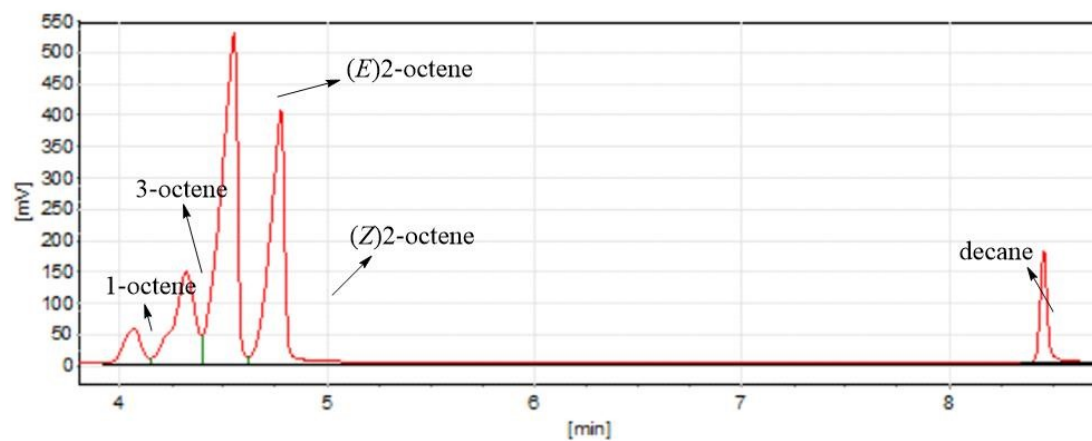

entry 12:



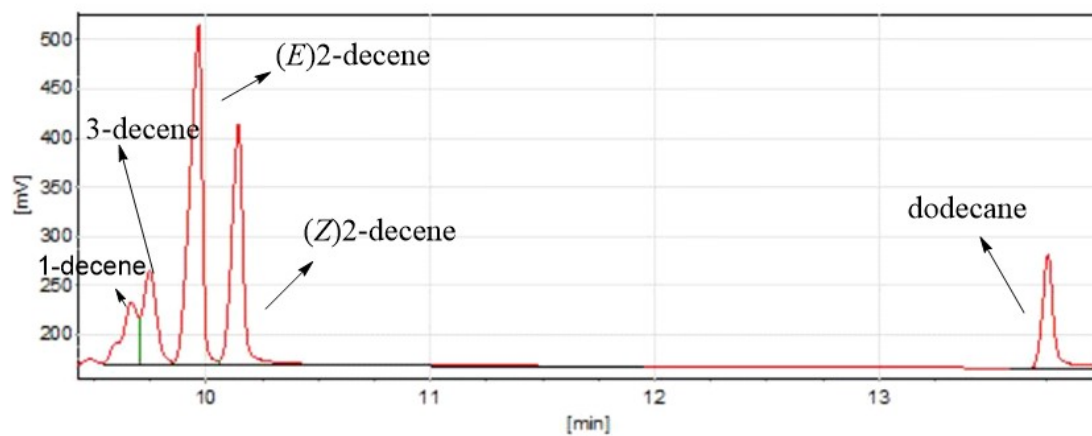

#### References:

- [1] Jia, X.; Liang, Z.; Chen, J.; Lv, J.; Zhang, K.; Gao, M.; Zong, L.; Xie, C. *Org. Lett.* **2019**, *21*, 2147-2150.
- [2] Luu, T. X. T.; Lam, T. T.; Le, T. N.; Duus, F. *Molecules* **2009**, *14*, 3411-3424.
- [3] Tiecco, M.; Tingoli, M. *J. Org. Chem.* **1985**, *50*, 3828-3831.
- [4] Thiery, E.; Chevrin, C.; Bras, J. L.; Harakat, D.; Muzart, J. *J. Org. Chem.* **2007**, *72*, 1859-1862.
- [5] Chen, J.; Liu, H.; Cai, C.; Ding, Y.; Liu, B.; Xia, Y. CN 110878001 A.
- [6] Tong, X.; Luo, S.; Shen, H.; Zhang, S.; Cao, Tian.; Luo, Y.; Huang, L.; Ma, X.; Liu, X. *Org. Chem. Front.* **2021**, *8*, 4533-4542.
- [7] Li, S.; Yuan, W.; Ma, S. *Angew. Chem. Int. Ed.* **2011**, *50*, 2578-2582.
